# Supplementary material
Source: Springer Nature journal article supplement (https://www.springermedizin.de/resource/supplementary/12879_2013_2725_MOESM7_ESM.pdf/9445262)

CCL3C  
CCL4A  
LTR61A

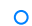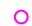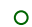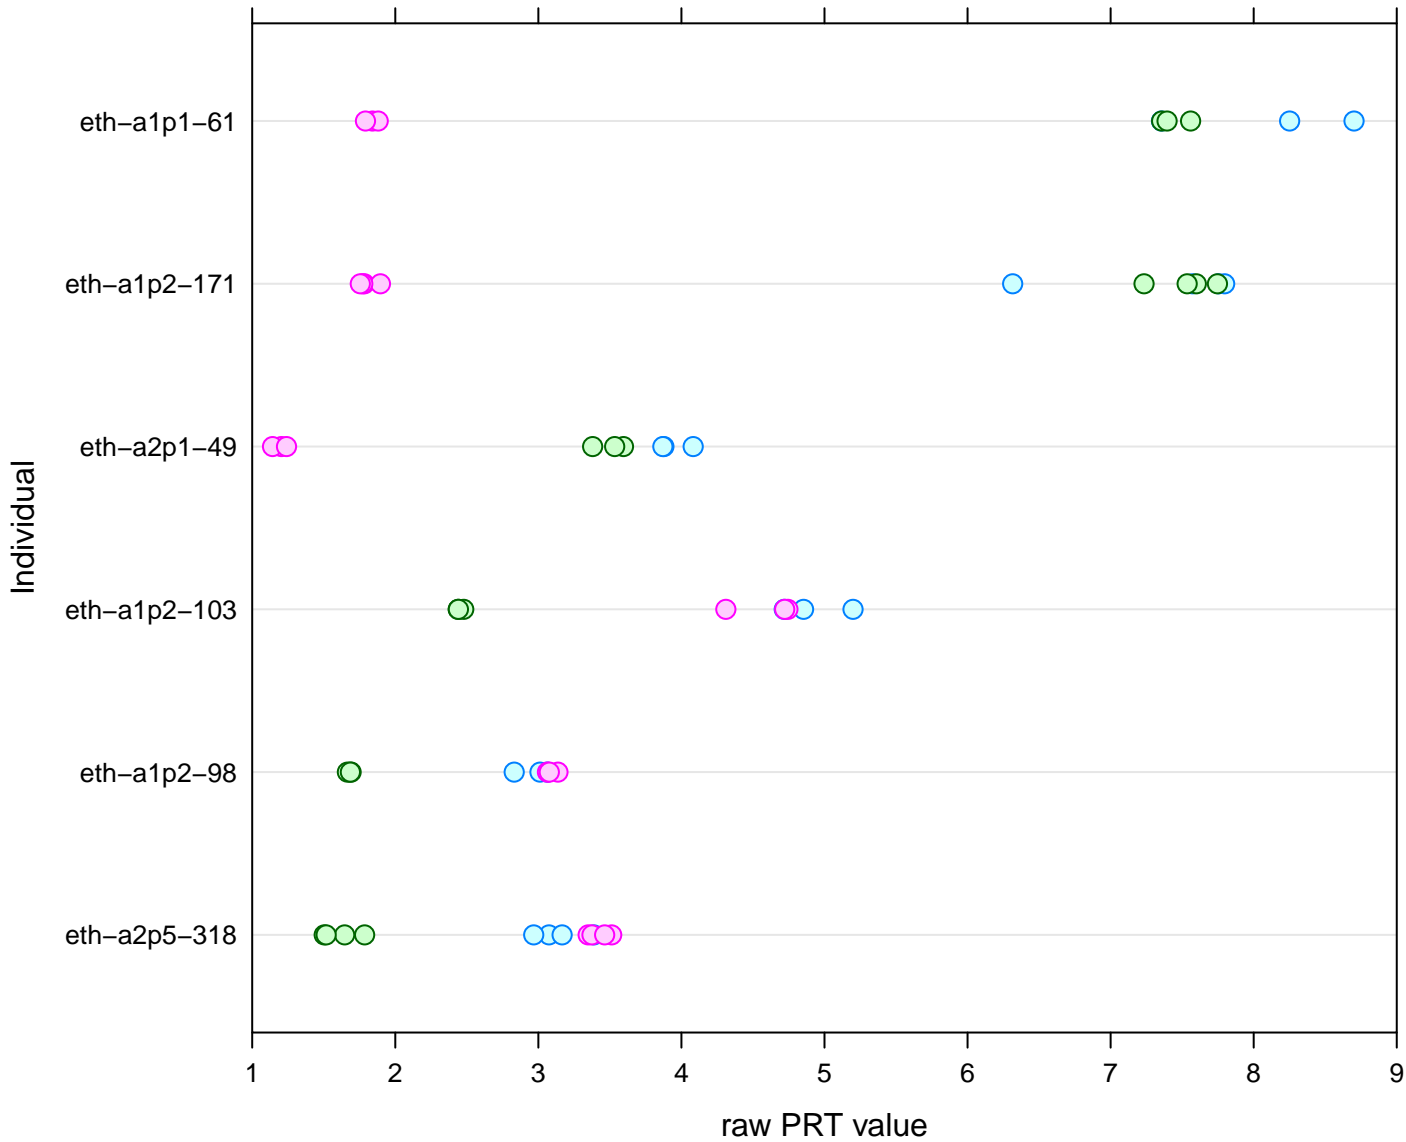

Supplement: MOESM7 [file 9445262]
